# Supplementary material for: Host outdoor exposure variability affects the transmission and spread of Zika virus: Insights for epidemic control
Source: PLOS journal article supplement (doi:10.1371/journal.pntd.0005851), 2017-09-14
Supplement: S1 (10.1371/journal.pntd.0005851.s001) [file journal.pntd.0005851.s001]

**Table S1. Characteristics of Study Participants**

| <b>Respondent Characteristic</b>                        | <b>Frequency</b> | <b>Percent (%)</b> |
|---------------------------------------------------------|------------------|--------------------|
| <b>Gender</b>                                           |                  |                    |
| Male                                                    | 115              | 41                 |
| Female                                                  | 155              | 55                 |
| <b>Age (Mean age= 48.9; range 18-94)</b>                |                  |                    |
| Younger than age 30                                     | 50               | 17.7               |
| 30-39                                                   | 25               | 8.9                |
| 40-49                                                   | 46               | 16.3               |
| 50-59                                                   | 57               | 20.2               |
| 60-69                                                   | 42               | 14.9               |
| 70+ years                                               | 31               | 11                 |
| <b>Marital Status</b>                                   |                  |                    |
| Single                                                  | 66               | 23                 |
| Married                                                 | 148              | 53                 |
| Separated                                               | 5                | 2                  |
| Divorced                                                | 25               | 9                  |
| Windowed                                                | 16               | 6                  |
| <b>Do you consider yourself Hispanic?</b>               |                  |                    |
| Yes                                                     | 172              | 61                 |
| No                                                      | 89               | 31.6               |
| <b>Yearly Income (2015)</b>                             |                  |                    |
| Less than \$25, 000                                     | 44               | 16.0               |
| \$25,000-\$50,000                                       | 54               | 19.1               |
| \$50,000-\$75,000                                       | 38               | 13.5               |
| \$75,000-\$100,000                                      | 28               | 9.9                |
| Over \$100,000                                          | 52               | 18                 |
| <b>Employment Status</b>                                |                  |                    |
| Fulltime                                                | 131              | 47                 |
| Part time or "semi-retired"                             | 14               | 5                  |
| Retired                                                 | 60               | 21.3               |
| Unemployed                                              | 18               | 6.4                |
| Student                                                 | 14               | 5                  |
| Student & Full-time/Part-time                           | 7                | 2.5                |
| <b>Education</b>                                        |                  |                    |
| Less than high school education                         | 6                | 2.1                |
| General Education Diploma or GED                        | 54               | 19.1               |
| Some college, including Associate degree                | 63               | 22.3               |
| Bachelor's degree                                       | 78               | 27.7               |
| Some graduate school                                    | 10               | 3.5                |
| Graduate degree or higher                               | 48               | 17                 |
| <b>Foreign Born</b>                                     |                  |                    |
| Yes                                                     | 148              | 52.5               |
| No                                                      | 112              | 39.7               |
| <b>Average hours per day spent outside on a weekday</b> |                  |                    |
| Less than an hour                                       | 113              | 40.1               |

|                                                         |     |      |
|---------------------------------------------------------|-----|------|
| 2-5 hours                                               | 120 | 42.6 |
| 5-10 hours                                              | 19  | 6.7  |
| 10 or more hours                                        | 11  | 3.9  |
| <b>Average hours per day spent outside on a weekend</b> |     |      |
| Less than an hour                                       | 34  | 12.1 |
| 2-5 hours                                               | 135 | 47.9 |
| 5-10 hours                                              | 26  | 9.2  |
| 10 or more hours                                        | 10  | 3.5  |

---
